# Supplementary material
Source: PubMed Central journal article supplement (PMC4055500)
Supplement: NIHMS583081-supplement-125_2014_3227_MOESM2_ESM.pdf [file NIHMS583081-supplement-125_2014_3227_MOESM2_ESM.pdf]

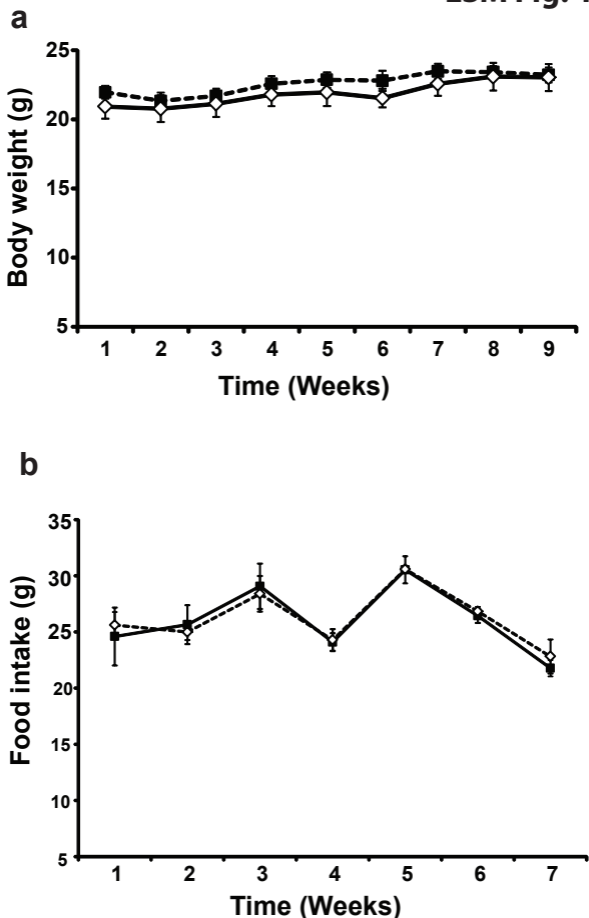

**Supplemental Fig. 1:** Body weight and food intake characteristics of the Doc2b Tg mice. (A) Body weights of 5 pairs of littermate Doc2b transgenic (black squares) and wild-type (white diamonds) female mice were monitored over a period of 9 weeks, and (B) food intake measured weekly for 7 weeks. Data represent the average  $\pm$  SE.
