# Supplementary material
Source: PubMed Central journal article supplement (PMC4055500)
Supplement: NIHMS583081-supplement-125_2014_3227_MOESM3_ESM.pdf [file NIHMS583081-supplement-125_2014_3227_MOESM3_ESM.pdf]

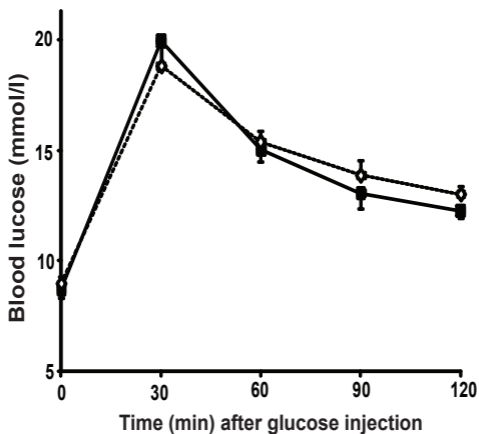

**Supplemental Fig. 2:** IPGTT of the lower-expressing Doc2b Tg line. Doc2b Tg (black squares) and Wt (white diamonds) 4-6 month old female littermate mice were fasted for 6 hours and IPGTT performed. Data represent the average  $\pm$  SE from 5 pairs of mice.
