# Supplementary material
Source: PubMed Central journal article supplement (PMC4055500)
Supplement: NIHMS583081-supplement-125_2014_3227_MOESM4_ESM.pdf [file NIHMS583081-supplement-125_2014_3227_MOESM4_ESM.pdf]

## ESM Fig. 3

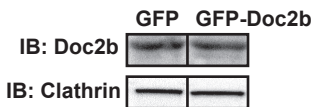

**Supplemental Fig. 3:** Endogenous expression of Doc2b in detergent lysates prepared from L6 GLUT4-myc myoblasts transfected to express GFP-tagged Doc2b or GFP alone and stimulated with insulin. Data are representative of three independent experiments.
