# Supplementary material
Source: PubMed Central journal article supplement (PMC4055500)
Supplement: NIHMS583081-supplement-125_2014_3227_MOESM5_ESM.pdf [file NIHMS583081-supplement-125_2014_3227_MOESM5_ESM.pdf]

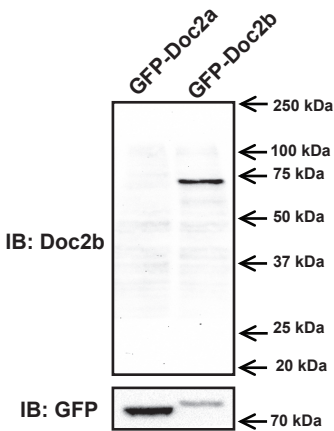

**Supplemental Fig. 4:** Doc2b antibody specifically recognizes Doc2b. To confirm specificity of the antibody used, GFP-Doc2a and GFP-Doc2b were expressed in Chinese hamster ovary (CHO) cells by electroporation, and 48 h later detergent cell lysates were prepared and proteins resolved by 10% SDS-page for immunoblotting (IB). The full-length membrane is shown to reveal that the antibody recognized only one band of the expected molecular weight, no band was detected in Doc2a expressing cells. Anti GFP immunoblotting confirmed the expression and appropriate molecular weights of the fusion proteins.
